# Supplementary material for: Multi-level engineering of Saccharomyces cerevisiae for the synthesis and accumulation of retinal
Source: Royal Society of Chemistry journal article supplement (doi:10.1039/d2gc03073j), 2022-01-01
Supplement: d2gc03073j1.pdf [file d2gc03073j1.pdf]

## Supporting information

### **Multi-level engineering of *Saccharomyces cerevisiae* for synthesis and accumulation of retinal**

Qiwen Mo<sup>a</sup>, Wei Song<sup>a</sup>, Zheyong Xue<sup>\*b</sup>, Jifeng Yuan<sup>\*a</sup>

## Table of Contents

|                                                                                                            |            |
|------------------------------------------------------------------------------------------------------------|------------|
| <b>1. Experimental Procedures</b>                                                                          | <b>S3</b>  |
| <b>1.1 Strains, culture media and reagents</b>                                                             | <b>S3</b>  |
| <b>1.2 Plasmid construction</b>                                                                            | <b>S3</b>  |
| <b>1.3 Genetic modification of budding yeast</b>                                                           | <b>S3</b>  |
| <b>1.4 <i>De novo</i> synthesis of carotenoids and retinoids<br/>        in the engineered yeast cells</b> | <b>S3</b>  |
| <b>1.5 Analysis of carotenoids and retinoids</b>                                                           | <b>S4</b>  |
| <b>2. Supporting Figures</b>                                                                               | <b>S5</b>  |
| <b>3. Supporting Tables</b>                                                                                | <b>S7</b>  |
| <b>4. Reference</b>                                                                                        | <b>S11</b> |

---

<sup>a.</sup> State Key Laboratory of Cellular Stress Biology,  
School of Life Sciences, Faculty of Medicine and Life Sciences, Xiamen University, Fujian 361102, PR China

<sup>b.</sup> Ministry of Education, Key Laboratory of Saline-alkali Vegetation Ecology Restoration, Northeast  
Forestry University, Heilongjiang 150040, PR China

\* Corresponding author: xuezhy@126.com and jfyuan@xmu.edu.cn



# 1 Experimental Procedures

## 1.1 Strains, culture media and reagents

*Escherichia coli* strain DH5 $\alpha$  was used for plasmid construction purposes, and the strains harboring plasmid were cultivated at 37°C in Luria-Bertani broth (10.0 g/L tryptone, 5.0 g/L yeast extract, and 10.0 g/L NaCl) with 100  $\mu$ g/mL ampicillin. *S. cerevisiae* BY4741 (MAT $\alpha$ , *his3 $\Delta$ 1*, *leu2 $\Delta$ 0*, *lys2 $\Delta$ 0*, *ura3 $\Delta$ 0*) was used as the parental strain for all subsequent strain constructions. *S. cerevisiae* BY4741 was cultured in rich YPD medium (10 g/L yeast extract, 20 g/L tryptone and 20 g/L glucose), and the engineered strains with different auxotrophic selection markers were grown in synthetic complete (SC) medium with appropriate dropouts. All restriction enzymes, T4 ligase, Taq polymerase and High-fidelity Phusion polymerase were obtained from New England Biolabs (Beverly, MA, USA). Gel extraction kit and plasmid purification kit were purchased from BioFlex (Shanghai, China). Ampicillin and 5-fluoroorotic acid were purchased from Sangon Biotech (Shanghai, China). Phleomycin was purchased from (Invivo, China). The standard retinal (Cat. No. A122355), retinol (Cat. No. V111674), and  $\beta$ -carotene (Cat. No. C110502) were purchased from Aladdin Biotech (Shanghai, China). Lycopene (Cat. No. 013226884) was purchased from Adamas Biotech (Shanghai, China).

## 1.2 Plasmid construction

Oligonucleotides used for plasmid construction were synthesized by Sangon Biotech (Shanghai, China) and the details are listed in Supplementary Table S1. Plasmid YEplac195-YB//E was a kind gift from Prof. Gerhard Sandmann. The *BLH* gene from the marine bacterium 66A03 was kindly provided by Prof. Lidan Ye from Zhejiang University. Plasmid p $\delta$ BLE2.0-ERG13/ERG10, p $\delta$ BLE2.0-ERG12/tHMG1, p $\delta$ BLE2.0-ERG19/ERG8 and p $\delta$ BLE2.0-IDI1/ERG20 from our previous report<sup>17</sup> was used for optimizing the MVA pathway. Plasmid pRS426-ACL was derived from pESC-URA with insertion of *ACL1* and *ACL2* gene from *Y. lipolytica*. For expressing *crtE*, *crtYB* and *crtI* genes under the galactose-regulated promoter, all the genes were PCR amplified from the plasmid YEplac195-YB//E, and subsequently inserted into p $\delta$ BLE1.1<sup>1</sup> to yield p $\delta$ BLE-CrtE, p $\delta$ BLE-CrtYB and p $\delta$ BLE-CrtI. The *BLH* gene was inserted into pRS425GAL1 to yield pRS425GAL1-BLH. The guide RNA (gRNA) expressing plasmids were constructed via the golden-gate assembly method. All plasmids used in this study are listed in the Supplementary Table S2.

## 1.3 Genetic modification of budding yeast

For CRISPR/Cas9 mediated genome editing, the standard protocol of *S. cerevisiae* transformation was carried out by electroporation with minimal modification<sup>2</sup>. 50  $\mu$ l of yeast cells together with approximately 2  $\mu$ g mixture of genome editing cassette was electroporated in a 0.2 cm cuvette at 1.6 kV. After electroporation, cells were immediately mixed with 900  $\mu$ l YPD medium and recovered a rotary shaker for 1 h. Following that, cells were collected by centrifugation at 3000 rpm for 5 min, washed and resuspended in 50  $\mu$ l ddH<sub>2</sub>O. Next, 50  $\mu$ l cells were plated on SC plate with appropriate dropouts. Colonies were randomly picked from the plate and subjected to diagnostic PCR verification of genome editing events. Successful genome manipulations were confirmed by diagnostic PCR before proceeding to the next round of genetic modifications. Subsequently, gRNA expressing plasmid was eliminated via counter-selection with 1 g/l 5-fluoroorotic acid (5-FOA), and the Cas9-expressing plasmid was removed via a series dilution and confirmed by diagnostic PCR.

For combinatorial optimization of the MVA pathway, plasmid p $\delta$ BLE2.0-ERG13/ERG10, p $\delta$ BLE2.0-ERG12/tHMG1, p $\delta$ BLE2.0-ERG19/ERG8, and p $\delta$ BLE2.0-IDI1/ERG20 were served as template and primer pair F\_Delta\_Int/R\_Delta\_Int was used for the subsequent PCR amplification of the linear genome integration cassettes as previously described<sup>1</sup>. Cells were directly spotted on YPD agar plate supplemented with 240  $\mu$ g/mL phleomycin, to achieve combinatorial integration of the MVA modules into yeast chromosomes.

## 1.4 De novo synthesis of carotenoids and retinoids in the engineered yeast cells

For small-scale characterization of carotenoid production in the engineered yeasts, experiments were carried out in 14 ml tubes supplemented with 2 ml culture medium. The strains were picked from the plate and inoculated

into SC medium with appropriate dropouts. Next day, 14 ml sterile tubes containing 2 ml medium supplemented with 2% glucose and 20  $\mu$ M copper sulphate were inoculated with fresh overnight cultures to an initial OD<sub>600</sub> of 0.1. After 48 h cultivation, 100  $\mu$ L of cell culture was taken for determining  $\beta$ -carotene using high-performance liquid chromatography (HPLC).

For the retinoid production, experiments were carried out in shake-flasks. 100 ml flasks containing 20 ml medium supplemented with 2% glucose and 20  $\mu$ M copper sulphate were inoculated with fresh overnight cultures to an initial OD<sub>600</sub> of 0.1. Subsequently, 4 ml dodecane was added for *in situ* extraction of retinoids during the fermentation process. The OD<sub>600</sub> and retinoid levels were continuously monitored for 120 h. The organic phase was used for determining the retinoid levels using the HPLC system.

## 1.5 Analysis of carotenoids and retinoids

In the two-phase culture system with a dodecane overlay, the upper dodecane phase containing the retinoids was collected and centrifuged for 10 min at 14,000 rpm to remove all cellular particles. The intracellular content of carotenoids was extracted from yeast cell pellets with acetone. Specifically, the harvested cells were resuspended with 1ml acetone in a 2 ml screwed cap tube and crushed by a bead ruptor (OMNI, USA). After centrifugation, supernatants were collected in a new brown tube for measuring the carotenoid levels. The acetone extracts and dodecane phases were analyzed with HPLC (LC-20A, Shimadzu) equipped with a C18 column (250 mm  $\times$  4.6 mm, 5  $\mu$ m). The mobile phases were 95:5 and 50:50 methanol and acetonitrile for the retinoid and carotenoids analyses, respectively. A flow rate of 1.5 ml/min (retinoid) or 1.0 ml/min (lycopene and  $\beta$ -carotene) and column temperature of 40°C were applied for the HPLC analysis. The detection wavelengths were set as following: 370 nm (retinal), 340 nm (retinol), 450 nm (lycopene), and 450 nm ( $\beta$ -carotene). All standards (retinal, retinol, lycopene and  $\beta$ -carotene) were dissolved in methanol for the subsequent plotting of the standard curve.

## 2 Supporting Figures

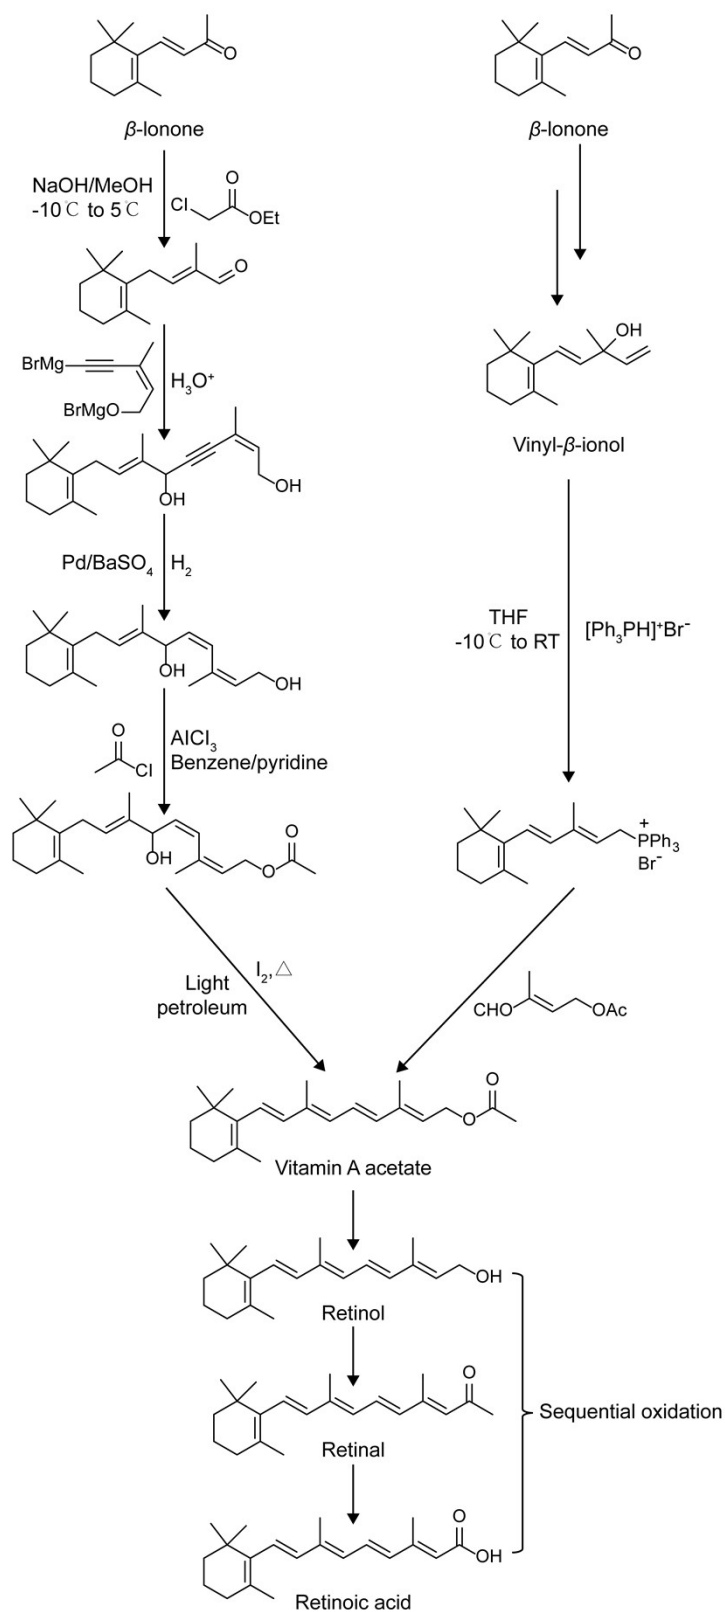

Figure S1. Roche (Left) and BASF (Right) synthesis of retinoids.

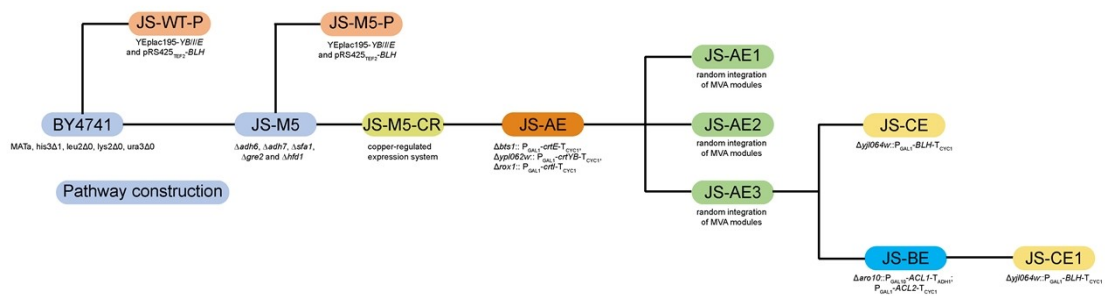

Figure S2. Flowchart of yeast strain construction in this study.

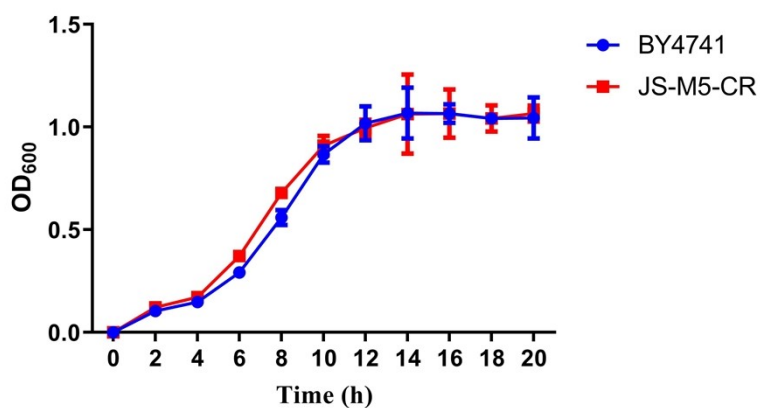

Figure S3. Evaluation the growth curves of strain BY4741 and JS-M5-CR. The growth data were collected by microplate reader.

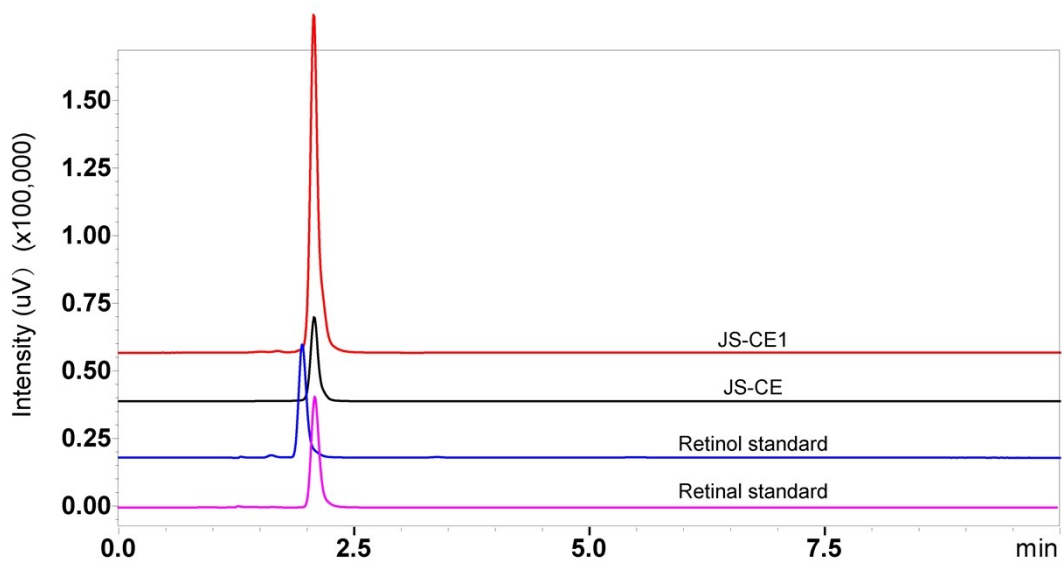

Figure S4. Representative HPLC of retinal production in strain JS-CE and JS-CE1 after 120 h cultivation.

### 3 Supporting Tables

**Table S1.** Oligonucleotides used in this study.

| Name           | Description                                                   |
|----------------|---------------------------------------------------------------|
| F_gRNA.adh6    | TTGGTCTCAGATGCTAGGGCCCAAGTCAAACAGGTTTTAGAGCTAGAAATAG          |
| F_gRNA.adh7    | TTGGTCTCAGATGACCACCACACAATAATGGAGGTTTTAGAGCTAGAAATAG          |
| F_gRNA.sfa1    | TTGGTCTCAGATGCTTGGGATTAACAAAATCCGGTTTTAGAGCTAGAAATAG          |
| F_gRNA.hfd1    | TTGGTCTCAGATGAAATGGCAATAACAAGTGGGTTTTAGAGCTAGAAATAG           |
| F_gRNA.gre2    | TTGGTCTCAGATGAAAGGCCGAGAATTTAACGGGTTTTAGAGCTAGAAATAG          |
| F_gRNA.bts1    | TTGGTCTCAGATGGATAATGCTCCCTTGAGAAGGTTTTAGAGCTAGAAATAGC         |
| F_gRNA.ypl062w | TTGGTCTCAGATGGCCTTATCCCGTGGGGATGTTTTAGAGCTAGAAATAGC           |
| F_gRNA.rox1    | TTGGTCTCAGATGTGTCTCGTTGAAGGGTCGTGTTTTAGAGCTAGAAATAGC          |
| F_gRNA.yjl064w | TTGGTCTCAGATGGAATTCTGTAGCAAACGCTGGTTTTAGAGCTAGAAATAGC         |
| F_gRNA.aro10   | TTGGTCTCAGATGGTTTTGAGTATCAAGTTGAGGTTTTAGAGCTAGAAATAG          |
| R_SUP4         | TTGGTCTCAAAGAGACATAAAAAACAAAAAAG                              |
| F-adh6-Del     | ATGTCTTATCCTGAGAAATTTGAAGGTATCGCTATTCAATTTACCTTAG             |
| R-adh6-Del     | CTAGTCTGAAAATCTTTGTCTGAGCCGACTAAGGTAATTTGAATAGCC              |
| F-adh7-Del     | ATGCTTACCAGAAAAATTTAGGGCATCGGTATTTCTTTACTTTGG                 |
| R-adh7-Del     | CTATTTATGGAATTTCTTATCATAATCGACCAAAGTAAAGGAAATACCG             |
| F-sfa1-Del     | ATGTCCGCCGCTACTGTTGGTAAACCTATTAAGTGCATTTGCTTAAGAA             |
| R-sfa1-Del     | CTATTTTATTTTCATCAGACTTCAAGACGGTTCTTAAGCAAATGCACTTA            |
| F-gre2-Del     | ATGTCAGTTTTCGTTTCAGGTGCTAACGGGTTTCATTGCCACTGCCTCCC            |
| R-gre2-Del     | TTATATTCTGCCCTCAAATTTTAAAATTTGGGAGGCAGTGGCAATGAAC             |
| F-hfd1-Del     | ATATTCTAAAACCATAGCCATAGTAATTTATCACCACATGTCACACCCCGGTTAAC      |
| R-hfd1-Del     | CTTATACATCAAATAATTAATTAACCTTAAACATTACGTTTAGTACAACGGTGACGCCG   |
| F-bts1-Int     | ATGGAGGCCAAGATAGATGAGCTGATCAATAATGATCCTGGAGCGACCTCATGCTATAC   |
| R-bts1-Int     | TCACAATTCGGATAAGTGGTCTATTATATATAACAATTCGCTTCGAGCGTCCCAAAACC   |
| F-ypl062w-Int  | ATGATAGAATTGGATTATGTAAGAGGTGAAGATACCATTGGAGCGACCTCATGCTATAC   |
| R-ypl062w-Int  | CTATATCGCATTGTTGCACTCACCGTTCCCAAGAGGAGACTTCGAGCGTCCCAAAACC    |
| F-rox1-Int     | ATGAATCCTAAATCCTCTACACCTAAGATTCCAAGACCCAGAGCGACCTCATGCTATAC   |
| R-rox1-Int     | TCATTTTCGGAGAACTAGGCTAGTTTTAGCGGTGACCTCACTTCGAGCGTCCCAAAACC   |
| F-yjl064w-Int  | ATGACACTTGTAGTATATCTAACTCGGTTTTCTTCCACTAGAGCGACCTCATGCTATAC   |
| R-yjl064w-Int  | TCAGGTAACACAATGAACAACGAGACTAGTGGTAAAGAACTTCGAGCGTCCCAAAACC    |
| F-aro10-Int    | GTTTATTAATACTACATAAAAATCTGATATAAAACATATTTTCTTCGAGCGTCCCAAAACC |
| R-aro10-Int    | ACAATTGGTAGCAGTGTTTTATAATTGCGCCACAAAGTTTGAGCGACCTCATGCTATACC  |
| F-Delta-Int    | TGTTGGAATAAAAAATCCACTATC                                      |
| R-Delta-Int    | ATGGGGTTCTCTGGAACAG                                           |
| F-adh6v        | ACAGCCACTCTCGTCACGGC                                          |
| R-adh6v        | CACCTTAAAGGTGCTTAGC                                           |
| F-adh7v        | GATACGTTTGGCTCTGTTGC                                          |
| R-adh7v        | CACTGTTGTCGAGAGATTC                                           |
| F-sfa1v        | AGACATGCGGTGTGTGGGTC                                          |
| R-sfa1v        | GTTAGGAACAGGCGAGGTC                                           |
| F-gre2v        | ACATTGTTGTACGCTATAG                                           |



|               |                                         |
|---------------|-----------------------------------------|
| R-gre2v       | GCTTATCTGAACGTTTCTC                     |
| F-hfd1v       | CTTAGAGGAAATGGAACAAC                    |
| R-hfd1v       | GAAAGGTACTTATACATC                      |
| BLH-BamHI-F   | CGCGGATCCAAACAATGGGTTTAATGTTAATTGATTGG  |
| BLH-XhoI-R    | CGGCTCGAGTTAATTTTAATTTAATCCTTGAAGAATGTG |
| CrtE-BamHI-F  | TTGGTCTCGGATCCAAACAATGGATTACGCGAACATCC  |
| CrtE-XhoI-R   | TTGGTCTCCTCGAGTCACAGAGGGATATCGGCTAG     |
| CrtYB-BamHI-F | CGGGATCCAAACAATGACGGCTCTCGCATATTAC      |
| CrtYB-XhoI-R  | TTGGTCTCCTCGAGTTACTGCCCTTCCCATCCGC      |
| CrtI-BamHI-F  | CGGGATCCAAACAATGGGAAAAGAACAAGATCAG      |
| CrtI-XhoI-R   | TTGGTCTCCTCGAGTCAGAAAGCAAGAACACCAAC     |
| ACL1_BamHI_F  | GGGATCCAAAACAATGTCTGCCAACGAGAACATC      |
| ACL1_Sall_R   | AGACGCGTCGACTTATGATCGAGTCTTGCC          |
| ACL2_EcoRI_F  | GGAATTCAAAACAATGTCAGCGAAATCCATTC        |
| ACL2_XbaI_R   | GCTCTAGATTAAACTCCGAGAGGAGTG             |

---

**Table S2** Plasmids and strains used in this study.

| Name                              | Description                                                                                                                                                                                                                                         |
|-----------------------------------|-----------------------------------------------------------------------------------------------------------------------------------------------------------------------------------------------------------------------------------------------------|
| <b>Plasmid</b>                    |                                                                                                                                                                                                                                                     |
| p415-GPD-Cas9                     | Plasmid harboring Cas9 gene under the control of GPD promoter with LEU selection marker                                                                                                                                                             |
| pRS426SNR52                       | Plasmid harboring P <sub>SNR52</sub> -T <sub>SUP4</sub> cassette                                                                                                                                                                                    |
| pRS426-gRNA(adh6)                 | pRS426SNR52 derivative with P <sub>SNR52</sub> -gRNA <sub>adh6</sub> -T <sub>SUP4</sub>                                                                                                                                                             |
| pRS426-gRNA(adh7)                 | pRS426SNR52 derivative with P <sub>SNR52</sub> -gRNA <sub>adh7</sub> -T <sub>SUP4</sub>                                                                                                                                                             |
| pRS426-gRNA(sfa1)                 | pRS426SNR52 derivative with P <sub>SNR52</sub> -gRNA <sub>sfa1</sub> -T <sub>SUP4</sub>                                                                                                                                                             |
| pRS426-gRNA(gre2)                 | pRS426SNR52 derivative with P <sub>SNR52</sub> -gRNA <sub>gre2</sub> -T <sub>SUP4</sub>                                                                                                                                                             |
| pRS426-gRNA(hfd1)                 | pRS426SNR52 derivative with P <sub>SNR52</sub> -gRNA <sub>hfd1</sub> -T <sub>SUP4</sub>                                                                                                                                                             |
| pRS426-gRNA(bts1)                 | pRS426SNR52 derivative with P <sub>SNR52</sub> -gRNA <sub>bts1</sub> -T <sub>SUP4</sub>                                                                                                                                                             |
| pRS426-gRNA(yjl064w)              | pRS426SNR52 derivative with P <sub>SNR52</sub> -gRNA <sub>yjl064w</sub> -T <sub>SUP4</sub>                                                                                                                                                          |
| pRS426-gRNA(rox1)                 | pRS426SNR52 derivative with P <sub>SNR52</sub> -gRNA <sub>rox1</sub> -T <sub>SUP4</sub>                                                                                                                                                             |
| pRS426-gRNA(ypl062w)              | pRS426SNR52 derivative with P <sub>SNR52</sub> -gRNA <sub>ypl062w</sub> -T <sub>SUP4</sub>                                                                                                                                                          |
| pRS426-gRNA(aro10)                | pRS426SNR52 derivative with P <sub>SNR52</sub> -gRNA <sub>aro10</sub> -T <sub>SUP4</sub>                                                                                                                                                            |
| pδBLE1.1 <sup>1</sup>             | Plasmid harboring P <sub>GAL1</sub> -T <sub>CYC1</sub> cassette                                                                                                                                                                                     |
| pδBLE-CrtE                        | pδBLE1.1::P <sub>GAL1</sub> - <i>crtE</i> -T <sub>ADH1</sub>                                                                                                                                                                                        |
| pδBLE-CrtYB                       | pδBLE1.1::P <sub>GAL1</sub> - <i>crtYB</i> -T <sub>ADH1</sub>                                                                                                                                                                                       |
| pδBLE-CrtI                        | pδBLE1.1::P <sub>GAL1</sub> - <i>crtI</i> -T <sub>ADH1</sub>                                                                                                                                                                                        |
| pRS426-gRNA(CR) <sup>3</sup>      | pRS426SNR52 derivative with P <sub>SNR52</sub> -gRNA <sub>P<sub>GAL4</sub></sub> -T <sub>SUP4</sub> , and P <sub>SNR52</sub> -gRNA <sub>P<sub>GAL80</sub></sub> -T <sub>SUP4</sub>                                                                  |
| pδBLE2.0-ERG13/ERG10 <sup>4</sup> | pδBLE2.0::P <sub>GAL10</sub> - <i>ERG13</i> -T <sub>ADH1</sub> ; P <sub>GAL1</sub> - <i>ERG10</i> -T <sub>CYC1</sub>                                                                                                                                |
| pδBLE2.0-ERG12/IHMG1 <sup>4</sup> | pδBLE2.0::P <sub>GAL10</sub> - <i>ERG12</i> -T <sub>ADH1</sub> ; P <sub>GAL1</sub> - <i>IHMG1</i> -T <sub>CYC1</sub>                                                                                                                                |
| pδBLE2.0-ERG19/ERG8 <sup>4</sup>  | pδBLE2.0::P <sub>GAL10</sub> - <i>ERG19</i> -T <sub>ADH1</sub> ; P <sub>GAL1</sub> - <i>ERG8</i> -T <sub>CYC1</sub>                                                                                                                                 |
| pδBLE2.0-IDI1/ERG20 <sup>4</sup>  | pδBLE2.0::P <sub>GAL10</sub> - <i>IDI1</i> -T <sub>ADH1</sub> ; P <sub>GAL1</sub> - <i>ERG20</i> -T <sub>CYC1</sub>                                                                                                                                 |
| pRS426-ACL                        | pESC-URA derivative with P <sub>GAL10</sub> - <i>ACL1</i> -T <sub>ADH1</sub> ; P <sub>GAL1</sub> - <i>ACL2</i> -T <sub>CYC1</sub>                                                                                                                   |
| YEplac195-YB//E                   | Plasmid harboring <i>crtYB//E</i> gene from <i>X. dendrorhous</i>                                                                                                                                                                                   |
| pRS425TEF2-BLH                    | pRS425TEF2 derivative with P <sub>TEF2</sub> - <i>BLH</i> -T <sub>CYC1</sub>                                                                                                                                                                        |
| pRS425GAL1-BLH                    | pRS425GAL1 derivative with P <sub>GAL1</sub> - <i>BLH</i> -T <sub>CYC1</sub>                                                                                                                                                                        |
| <b>Strain</b>                     |                                                                                                                                                                                                                                                     |
| BY4741                            | MATa <i>his3Δ1 leu2Δ0 met15Δ0 ura3Δ0</i>                                                                                                                                                                                                            |
| JS-M5                             | Strain BY4741 derivative with $\Delta adh6$ , $\Delta adh7$ , $\Delta sfa1$ , $\Delta gre2$ and $\Delta hfd1$                                                                                                                                       |
| JS-WT-P                           | Strain BY4741 transformed with YEplac195-YB//E and pRS425TEF2-BLH                                                                                                                                                                                   |
| JS-M5-P                           | Strain JS-M5 transformed with YEplac195-YB//E and pRS425TEF2-BLH                                                                                                                                                                                    |
| JS-M5-CR                          | Strain JS-M5 derivative with copper-regulated expression system <sup>3</sup>                                                                                                                                                                        |
| JS-AE                             | Strain JS-M5-CR derivative with $\Delta bts1$ :: P <sub>GAL1</sub> - <i>crtE</i> -T <sub>CYC1</sub> , $\Delta ypl062w$ :: P <sub>GAL1</sub> - <i>crtYB</i> -T <sub>CYC1</sub> , $\Delta rox1$ :: P <sub>GAL1</sub> - <i>crtI</i> -T <sub>CYC1</sub> |
| JS-AE1                            | One isolated variant derived from JS-AE with random integration of MVA modules under the control of GAL1/10 promoter                                                                                                                                |
| JS-AE2                            | One isolated variant derived from JS-AE with random integration of MVA modules under the control of GAL1/10 promoter                                                                                                                                |
| JS-AE3                            | One isolated variant derived from JS-AE with random integration of MVA                                                                                                                                                                              |

modules under the control of GAL1/10 promoter

|        |                                                                                                                              |
|--------|------------------------------------------------------------------------------------------------------------------------------|
| JS-BE  | Strain JS-AE3 derivative with $\Delta aro10::P_{GAL10}\text{-}ACL1\text{-}T_{ADH1}$ ; $P_{GAL1}\text{-}ACL2\text{-}T_{CYC1}$ |
| JS-CE  | Strain JS-AE3 derivative with $\Delta yjl064w::P_{GAL1}\text{-}BLH\text{-}T_{CYC1}$                                          |
| JS-CE1 | Strain JS-BE derivative with $\Delta yjl064w::P_{GAL1}\text{-}BLH\text{-}T_{CYC1}$                                           |

---

#### **4 References**

1. J. F. Yuan and C. B. Ching, *Biotechnol Bioeng*, 2014, **111**, 608-617.
2. S. X. Wu and G. J. Letchworth, *Biotechniques*, 2004, **36**, 152-154.
3. C. Fan, D. L. Zhang, Q. W. Mo and J. F. Yuan, *Microb Biotechnol*, 2022, DOI: 10.1111/1751-7915.14105.
4. J. F. Yuan and C. B. Ching, *Metab Eng*, 2016, **38**, 303-309.
